# Supplementary material for: Reactivation of tumour suppressor in breast cancer by enhancer switching through NamiRNA network
Source: PubMed Central journal article supplement — Nucleic Acids Res. 2021 Jul 30;49(15):8556–72. doi: 10.1093/nar/gkab626 (PMC8421228; doi:10.1093/nar/gkab626), 2021-07-30
Supplement: gkab626_supplemental_file.pdf [file gkab626_supplemental_file.pdf]

**Reactivation of Tumor Suppressor in Breast Cancer by Enhancer  
Switching through NamiRNA Network**

**Supplemental Materials**

**This file includes:**

Supplemental Figure 1-5.

Supplemental Table 1-7.

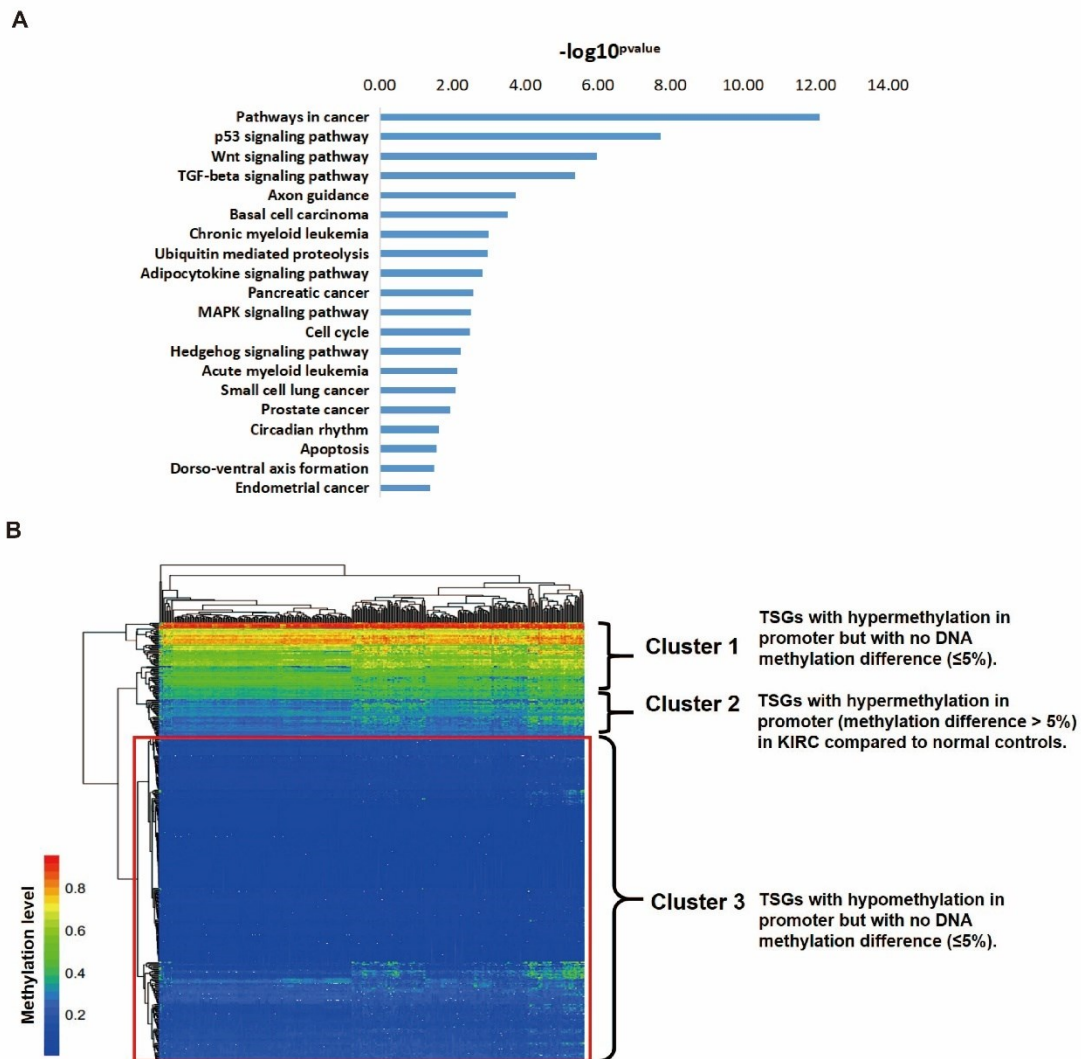

**Figure S1. GO analyses of downregulated TSGs in breast cancer and DNA methylation analyses of downregulated TSGs in kidney renal clear cell carcinoma (KIRC).** (A) TSGs in breast cancer are significantly linked to typically cancer-associated p53 and Wnt signaling pathways by GO analyses. The x-axis indicates the degree of GO pathway enrichment by P value. The y-axis indicates the name of the GO terms.  $P < 0.05$  indicates a significant difference. (B) Heatmap of promoter methylation status of TSGs in 320 TCGA samples. The difference between the mean methylation level of paired samples  $> 5\%$  followed by Wilcoxon Rank Sum Test was considered to be significant. Cluster 1 represents 64 TSGs (about 13.8%) are DNA hypermethylated in promoter regions in both cancer and normal controls but without methylation difference; Cluster 2 represents 42 TSGs (about 9.1%), exhibited relative DNA hypermethylation status in promoter regions; Cluster 3, as seen in red box, represents 358 downregulated TSGs (accounting for 77.1% of the total downregulated TSGs) showed hypomethylation but without methylation difference between breast cancer and normal controls.

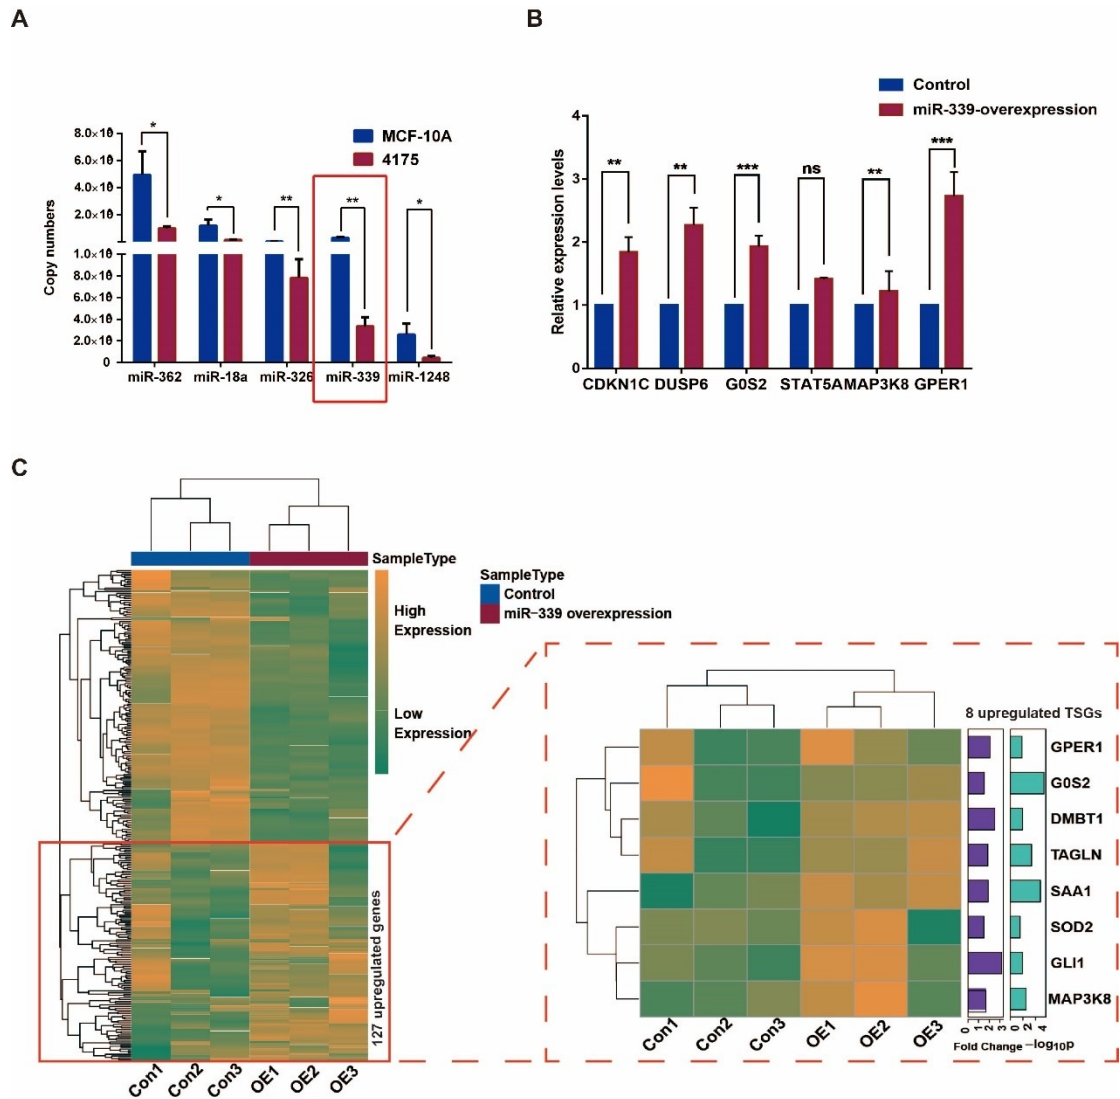

**Figure S2. miRNA and its target genes in breast cancer. (A)** The absolute copy numbers of 5 randomly selected NamiRNAs are fewer in breast cancer cell line 4175 than those in the normal breast cell line MCF-10A in absolute qPCR. **(B)** *GPER1* and another 5 selected target genes (*CDKN1C*, *DUSP6*, *G0S2*, *STAT5A*, *MAP3K8*) were upregulated when transfecting miR-339 in breast cancer cells by QPCR, while *GPER1* showed a highest expression level. **(C)** RNA-seq profiling of breast cancer cell 4175 compared to control group by high throughput sequencing in triplicate (fold change > 1.5,  $P < 0.05$ ). A total of 127 genes are upregulated (Left panel) and 8 TSGs positively regulated by miR-339 through targeting enhancer (Right panel). Con1, 2, 3 represent control groups, and OE1, 2, 3 represent miR-339 overexpression groups. Data are presented as Mean  $\pm$  s.d. of experiments conducted in triplicate. \*\*\* $P < 0.001$ . \*\* $P < 0.01$ . \* $P < 0.05$ . "ns" is representative of no significance.

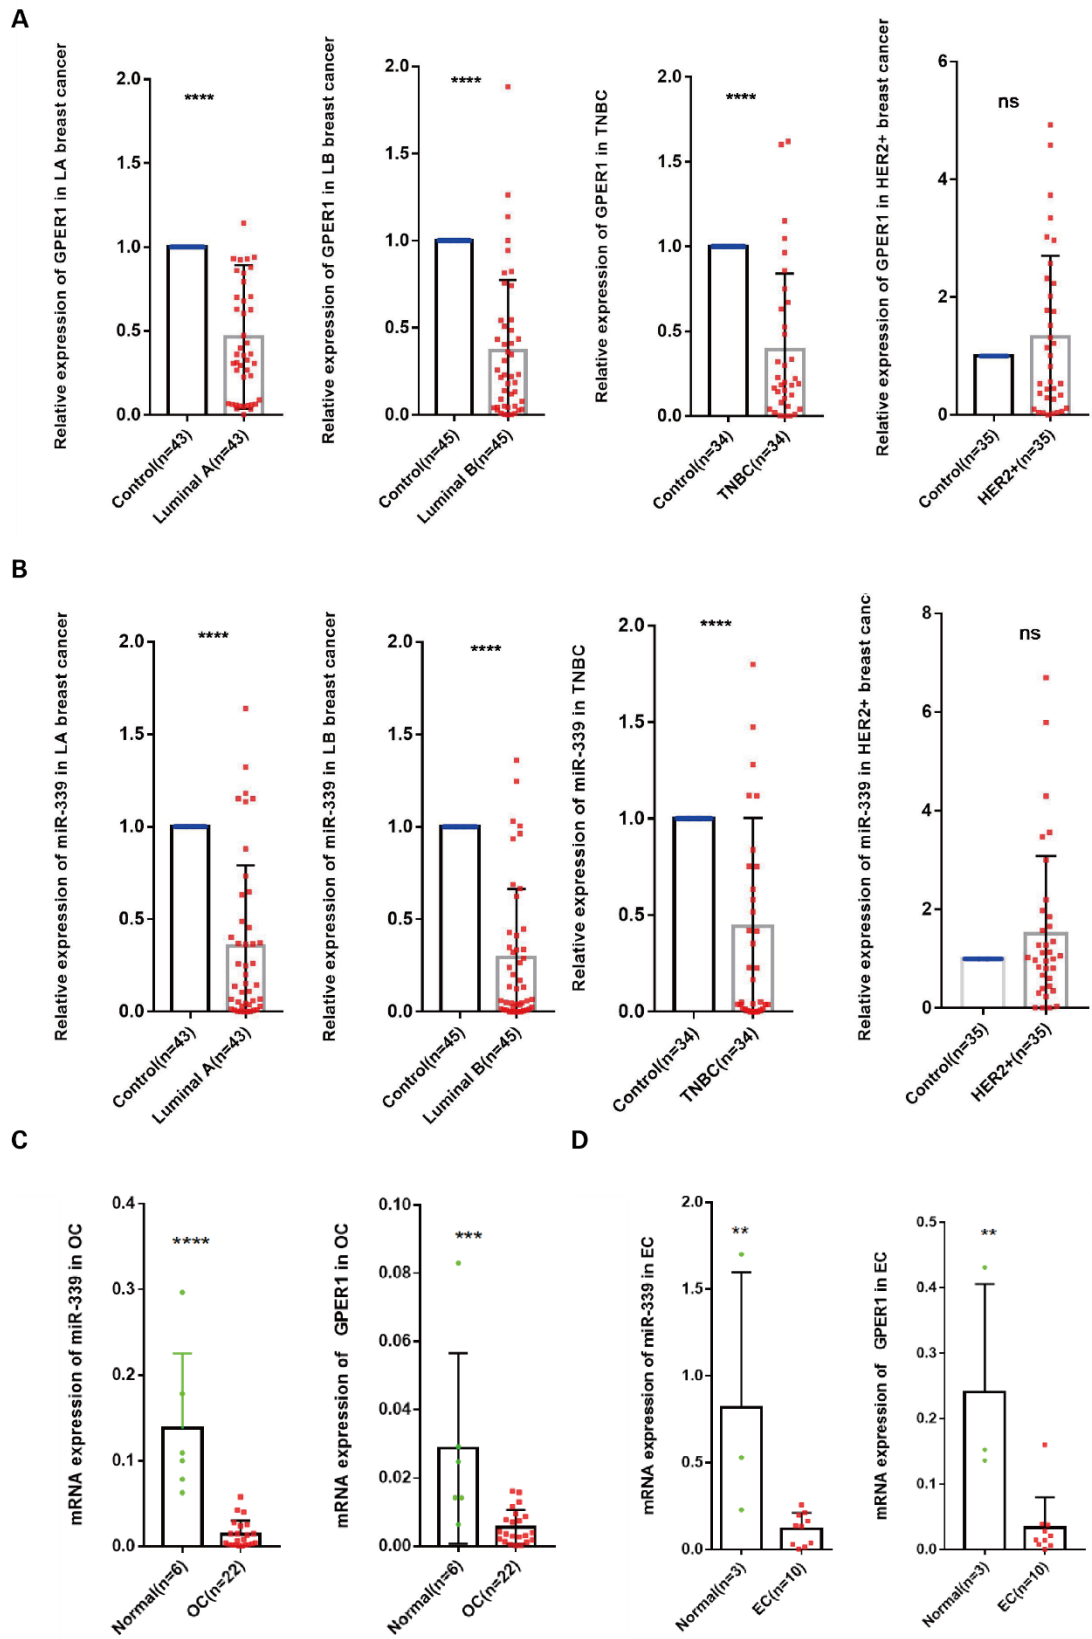

**Figure S3. miR-339 and its targeted gene *GPER1* expression in female hormone-related cancers. (A-B) *GPER1*, and miR-339 were both down-regulated in Luminal A, Luminal B and**

TNBC breast cancer subtypes compared to the corresponding adjacent control tissues except for the HER2-positive subgroup. LA, LB, and TNBC mean Luminal A, Luminal B, and TNBC breast cancer subtypes respectively. **(C)** Both miR-339 and *GPER1* were downregulated in ovarian cancer tissues compared to the normal controls. OC means ovarian cancer. **(D)** miR-339 and *GPER1* were similarly downregulated in endometrial cancer tissues compared to the normal controls. EC means endometrial cancer. Data are presented as Mean  $\pm$  s.d. of experiments conducted in triplicate. \*\*\*\*P < 0.0001. \*\*\*P < 0.001. \*\*P < 0.01. "ns" is representative of no significance.

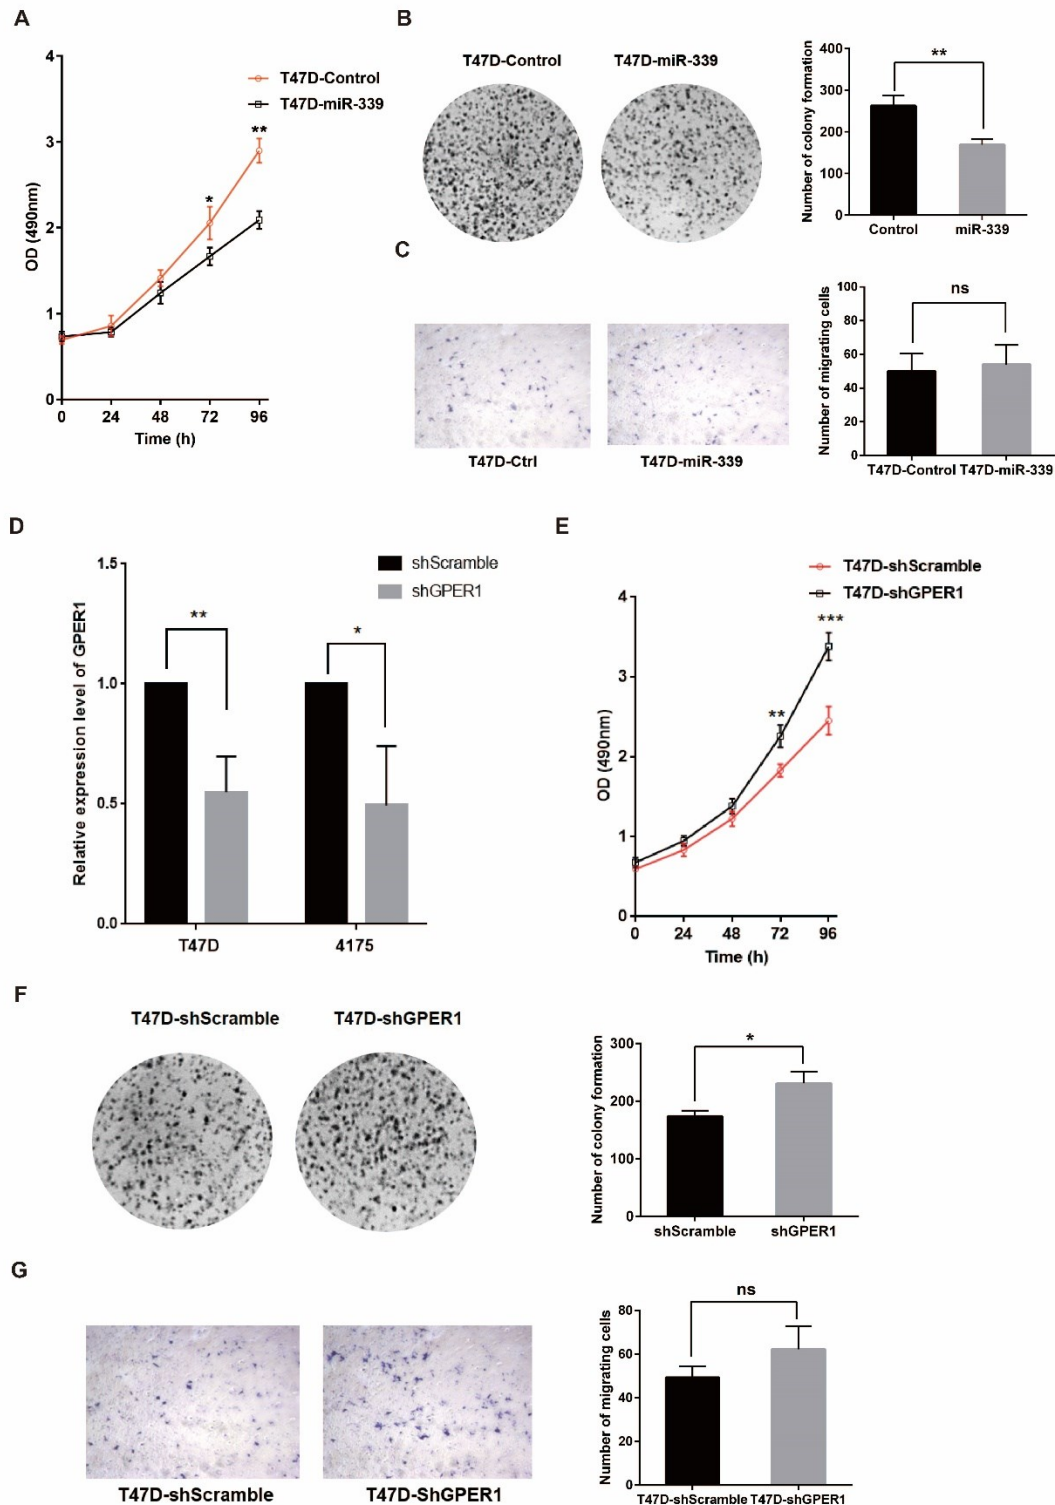

**Figure S4. miR-339 and *GPER1* inhibit the proliferation but not migration of breast cancer cell. (A-B)** miR-339 can repress breast cancer cell proliferation in T47D cells at 72 hours and 96 hours through CCK8 assay and colony forming assay. **(C)** No difference of migration ability between miR-339 transfected cells and control cells for T47D cells. **(D)** *GPER1* was successfully downregulated after transfecting shGPER1 lentivirus in 4175 and T47D breast cells by QPCR assay. **(E)** Knock-down *GPER1* by transfecting shGPER1 increased the

proliferation ability at 72 hours and 96 hours. **(F)** Knock-down *GPER1* by transfecting shGPER1 increased colony numbers in T47D cells. **(G)** No difference for migration ability after knocking down *GPER1* for T47D cells in transwell assay. \*\*\*P < 0.001. \*\*P < 0.01. \*P < 0.05. "ns" is representative of no significance.

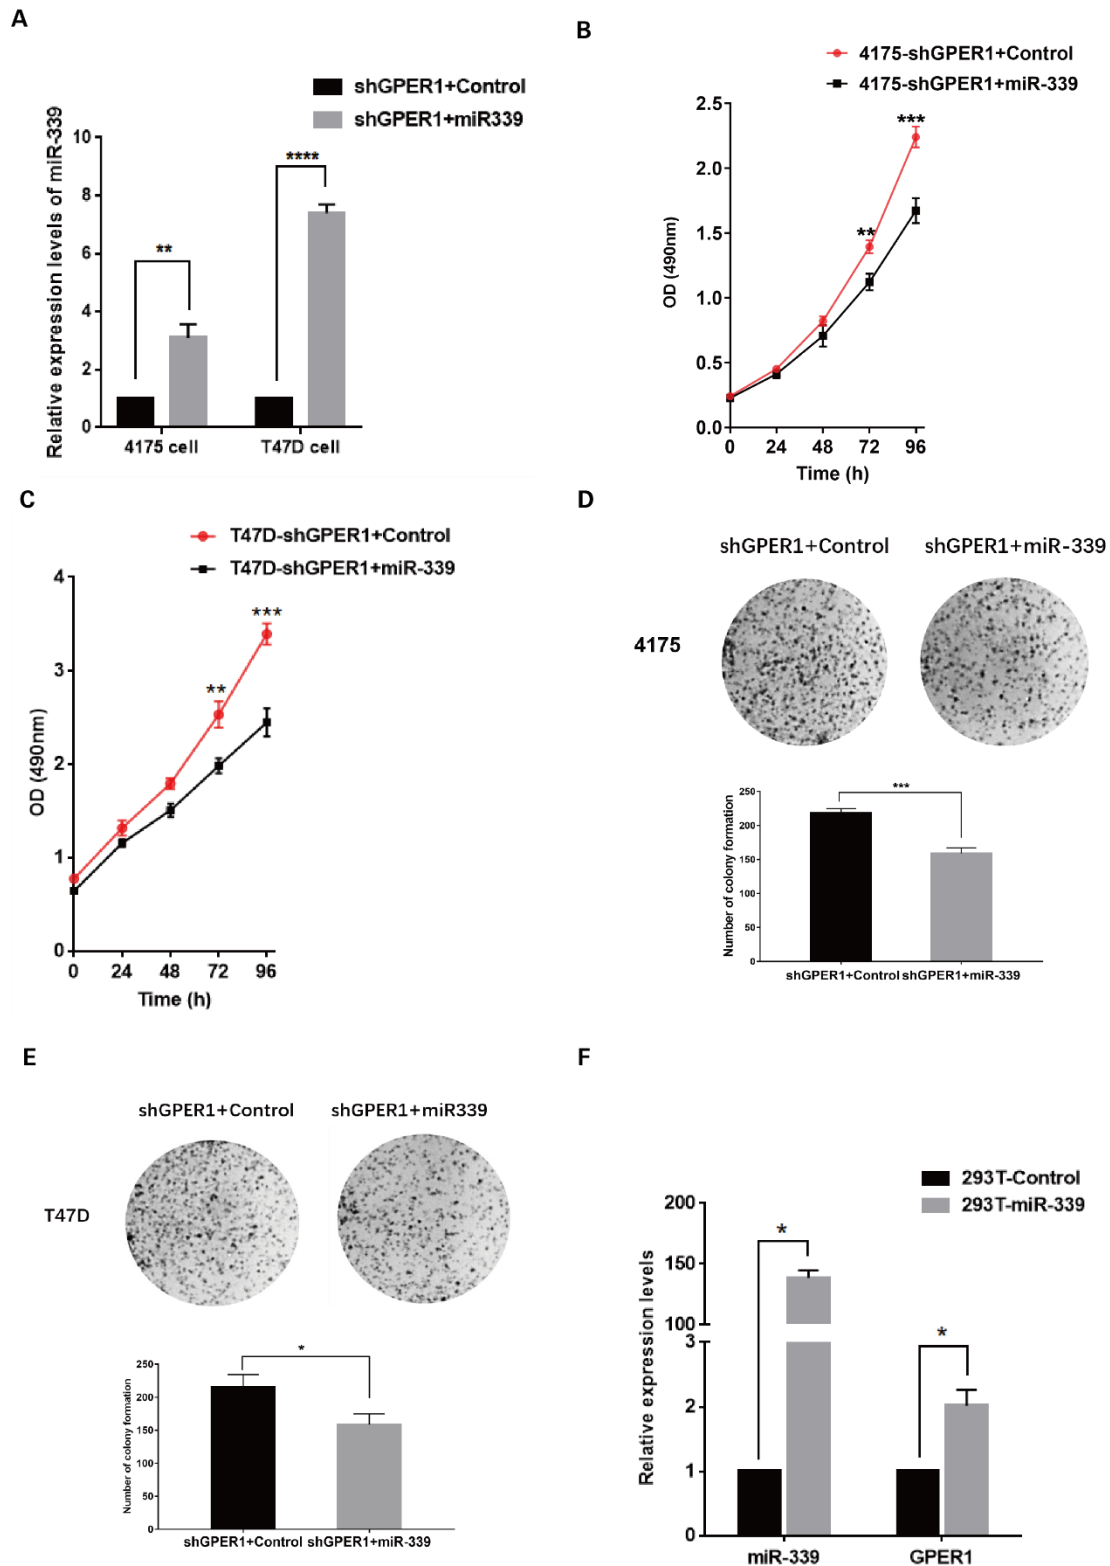

**Figure S5. Reactivation of *GPER1* by overexpressing miR-339 can inhibit the proliferation and growth of breast cancer cell. (A)** miR-339 expression after transfecting miR-339 lentivirus in 4175 and T47D breast cancer cells by QPCR assay. **(B-C)** The proliferation ability was repressed when transfected miR-339 in *GPER1* knock-down group for both 4175 **(B)** and T47D **(C)** breast cancer cells by CCK8 assays. **(D-E)** Colony numbers



decreased in *GPER1* knock-down group when transfected miR-339 in both 4175 **(D)** and T47D **(E)** breast cancer cells. **(F)** Transfecting miR-339 can activate *GPER1* expression in 293T cells. Data are presented as Mean  $\pm$  s.d. of experiments conducted in triplicate. \*\*\*\*P < 0.0001. \*\*\*P < 0.001. \*\*P < 0.01. \*P < 0.05.

**Supplemental Table 1. The primer sequences used for RT-PCR and ChIP-qPCR assays.**

| <b>Primer Names</b> | <b>Sequence (5'→3')</b>                |
|---------------------|----------------------------------------|
| miR-1248-F          | CGTCAGCTGTCCGAGTAGAGGACCTTCTTGTATAAGC  |
| miR-1248-R          | TGTCAGGCAACCGTATTCACCTTTAGCACAGT       |
| miR-326-F           | CGTCAGCTGTCCGAGTAGAGGCCTCTGGGCCCTT     |
| miR-326-R           | TGTCAGGCAACCGTATTCACCCTGGAGG           |
| miR-18a-F           | CGTCAGCTGTCCGAGTAGAGGTAAGGTGCATCTAGTG  |
| miR-18a-R           | TGTCAGGCAACCGTATTCACCCTATCTG           |
| miR-339-F           | CGTCAGCTGTCCGAGTAGAGGTCCCTGTCCTCCAGGA  |
| miR-339-R           | TGTCAGGCAACCGTATTCACCCGTGAGC           |
| miR-362-F           | CGTCAGCTGTCCGAGTAGAGGAATCCTTGGAACCTAGG |
| miR-362-R           | TGTCAGGCAACCGTATTCACCACTCACA           |
| GP1B-F              | TGTAATTCATCAACCTGGC                    |
| GP1B-R              | AGGAAGAAGACGCTGCTGTA                   |
| CDKN1C-F            | GCGATCAAGAAGCTGTCCGG                   |
| CDKN1C-R            | TCGCCCCGACGACTTCTCA                    |
| DUSP6-F             | CGGGCGTTCTACCTGGAAGGTG                 |
| DUSP6-R             | TCCGAGGAAGAGTCAGAGC                    |
| G0S2-F              | GCCGTGCCACTAAGGTCATTCC                 |
| G0S2-R              | ATCAGCTCCTGGACCGTTT                    |
| STAT5A-F            | CGTGCTACAGTCCTGGTGTGAG                 |
| STAT5A-R            | GGCCAGCATCTCCTCCACT                    |
| MAP3K8-F            | ATGGCGTGTAACCTGATCCCAG                 |
| MAP3K8-R            | CTCCAGAACAGACCCTCCC                    |
| GAPDH-F             | ACCGTCAAGGCTGAGAAC                     |
| GAPDH-R             | GCCTTCTCCATGGTGGTGA                    |
| AGO2-F              | AGGCGTGAACAACATCCTG                    |
| AGO2-R              | AGAAAGATGACGGGCTGCT                    |
| miR-339- ChIP -F    | ATACGAGTCCAGGGGCTGCTAC                 |
| miR-339- ChIP -R    | TGAGCGCCTCGACGACAGA                    |

**Supplemental Table 2. 383 downregulated TSGs in breast cancer.**

| <b>Gene</b> | <b>P-value</b> | <b>Log2(Fold change)</b> | <b>Gene</b> | <b>P-value</b> | <b>Log2(Fold change)</b> |
|-------------|----------------|--------------------------|-------------|----------------|--------------------------|
| ADIPOQ      | 2.31E-67       | -6.77                    | PPARG       | 3.50E-113      | -3.24                    |
| TUSC5       | 6.85E-81       | -6.47                    | SCGB3A1     | 8.87E-26       | -3.17                    |
| CD300LG     | 2.58E-131      | -6.46                    | ID4         | 2.70E-59       | -3.13                    |
| CIDEC       | 4.54E-89       | -6.45                    | EGR1        | 4.10E-77       | -3.12                    |
| FABP4       | 6.69E-80       | -6.18                    | IRX1        | 9.62E-37       | -3.11                    |
| CIDEA       | 3.75E-84       | -5.73                    | CSN1S1      | 2.94E-72       | -3.08                    |
| HEPACAM     | 7.62E-141      | -5.17                    | KL          | 6.37E-101      | -3                       |
| C2orf40     | 9.08E-88       | -5.1                     | LIFR        | 6.89E-106      | -2.99                    |
| WIF1        | 4.69E-60       | -4.95                    | EBF3        | 1.78E-102      | -2.95                    |
| ACVR1C      | 1.71E-132      | -4.91                    | SEMA3G      | 3.97E-94       | -2.94                    |
| CD36        | 2.59E-99       | -4.82                    | SYNPO2      | 1.25E-79       | -2.9                     |
| SFRP1       | 7.17E-60       | -4.82                    | PROX1       | 9.62E-63       | -2.89                    |
| SAA1        | 6.19E-67       | -4.79                    | SPRY2       | 4.61E-124      | -2.89                    |
| TAT         | 3.18E-31       | -4.49                    | IGF1        | 5.90E-55       | -2.87                    |
| ZBTB16      | 7.45E-75       | -4.44                    | SRPX        | 9.47E-88       | -2.87                    |
| HSPB7       | 2.78E-121      | -4.42                    | NTRK3       | 3.66E-35       | -2.86                    |
| BTNL9       | 4.17E-129      | -4.35                    | NGFR        | 2.36E-43       | -2.82                    |
| FHL1        | 8.64E-143      | -4.34                    | KRT17       | 7.73E-17       | -2.8                     |
| OXTR        | 1.93E-100      | -4.29                    | MT1M        | 7.62E-60       | -2.8                     |
| STAC2       | 3.62E-32       | -4.29                    | DEFB1       | 9.83E-30       | -2.79                    |
| DLK1        | 5.82E-50       | -4.27                    | AKAP12      | 1.54E-82       | -2.75                    |
| SYNM        | 4.17E-104      | -4.25                    | ADAMTS18    | 1.09E-39       | -2.73                    |
| MME         | 4.56E-106      | -4.24                    | DSC3        | 1.18E-19       | -2.72                    |
| G0S2        | 3.25E-86       | -4.11                    | UGT2B11     | 2.13E-12       | -2.72                    |
| GPIHBP1     | 1.73E-104      | -4.04                    | KLK6        | 2.14E-17       | -2.71                    |
| CDO1        | 4.90E-95       | -3.98                    | MIA         | 1.15E-19       | -2.71                    |
| TSLP        | 5.25E-124      | -3.98                    | CMTM5       | 9.55E-64       | -2.7                     |
| OLFM4       | 5.93E-31       | -3.91                    | NDRG2       | 2.05E-91       | -2.68                    |
| ALDH1A2     | 1.01E-96       | -3.88                    | RBMS3       | 7.32E-81       | -2.66                    |
| DMD         | 1.06E-117      | -3.81                    | BMP2        | 1.01E-67       | -2.65                    |
| LRRC3B      | 8.08E-173      | -3.79                    | TFPI2       | 2.82E-24       | -2.65                    |

---

|          |           |       |         |           |       |
|----------|-----------|-------|---------|-----------|-------|
| MUCL1    | 5.44E-19  | -3.78 | ANXA1   | 6.59E-101 | -2.61 |
| GPC3     | 7.51E-75  | -3.74 | DDR2    | 1.86E-58  | -2.61 |
| NNAT     | 2.14E-87  | -3.72 | KLF4    | 2.82E-87  | -2.6  |
| KIT      | 7.80E-74  | -3.6  | EDNRB   | 1.78E-86  | -2.57 |
| PCDH9    | 2.03E-87  | -3.57 | TCEAL7  | 8.19E-90  | -2.57 |
| CNN1     | 8.90E-91  | -3.54 | RBP7    | 1.29E-66  | -2.56 |
| CADM3    | 5.82E-53  | -3.51 | ANGPTL4 | 3.55E-40  | -2.55 |
| ITGA7    | 3.86E-104 | -3.51 | SHISA3  | 3.94E-61  | -2.54 |
| GPX3     | 9.75E-101 | -3.48 | PLA2G2A | 3.30E-17  | -2.51 |
| TP63     | 7.65E-45  | -3.41 | LALBA   | 2.50E-34  | -2.45 |
| CAV1     | 2.63E-154 | -3.38 | KLK10   | 7.87E-15  | -2.44 |
| TGFBR3   | 6.42E-79  | -3.34 | EGR2    | 2.02E-61  | -2.43 |
| PPP1R1B  | 5.27E-15  | -2.42 | PTCH2   | 8.86E-46  | -1.96 |
| ATF3     | 1.43E-54  | -2.41 | LRIG3   | 1.02E-55  | -1.95 |
| TGFBR2   | 2.17E-104 | -2.41 | ALPL    | 2.71E-40  | -1.94 |
| GSN      | 3.10E-129 | -2.38 | CADM2   | 9.65E-22  | -1.94 |
| SERPINB5 | 1.07E-15  | -2.38 | EPAS1   | 2.02E-91  | -1.93 |
| WNT11    | 1.18E-32  | -2.38 | SLIT2   | 5.82E-31  | -1.93 |
| MAPK10   | 2.71E-40  | -2.37 | LEFTY2  | 6.52E-20  | -1.9  |
| DCN      | 2.21E-47  | -2.34 | PEG3    | 4.23E-16  | -1.9  |
| DUSP1    | 3.70E-60  | -2.34 | RASL10A | 9.16E-44  | -1.9  |
| LRP1B    | 4.95E-16  | -2.34 | SPTBN1  | 1.37E-131 | -1.89 |
| CDKN1C   | 8.66E-76  | -2.29 | THRB    | 3.95E-52  | -1.89 |
| FAT4     | 2.23E-57  | -2.28 | NOV     | 5.98E-41  | -1.88 |
| LTF      | 6.8E-11   | -2.28 | CXCR2   | 2.56E-57  | -1.86 |
| WISP3    | 3.39E-25  | -2.28 | DLC1    | 1.52E-64  | -1.86 |
| CSN3     | 7.54E-23  | -2.27 | EMP1    | 1.42E-68  | -1.86 |
| ZFP36    | 1.38E-65  | -2.27 | ADAMTS8 | 1.01E-22  | -1.85 |
| AGTR1    | 5.56E-17  | -2.26 | ESR2    | 2.97E-74  | -1.85 |
| PIWIL2   | 2.24E-48  | -2.25 | RNF180  | 7.29E-54  | -1.85 |
| PARK2    | 4.12E-74  | -2.24 | CAT     | 3.01E-124 | -1.83 |
| CXCL12   | 4.76E-69  | -2.23 | IL17RD  | 5.18E-46  | -1.83 |
| MEG3     | 6.33E-42  | -2.23 | RND3    | 2.16E-50  | -1.83 |
| PACRG    | 1.51E-55  | -2.21 | DUSP6   | 2.15E-61  | -1.82 |
| TWIST2   | 1.23E-49  | -2.21 | GRIN2A  | 4.13E-25  | -1.81 |

---

---

|         |          |       |         |             |       |
|---------|----------|-------|---------|-------------|-------|
| PLAGL1  | 4.53E-64 | -2.2  | CSRNP1  | 2.51E-81    | -1.79 |
| L3MBTL4 | 3.87E-39 | -2.17 | GAS1    | 2.97E-37    | -1.78 |
| TXNIP   | 5.02E-99 | -2.17 | PRDM5   | 3.09E-52    | -1.78 |
| CXCL14  | 4.01E-18 | -2.13 | PLA2R1  | 1.97E-61    | -1.77 |
| NR4A1   | 1.52E-40 | -2.11 | AHNAK   | 2.27E-66    | -1.73 |
| SPARCL1 | 1.12E-68 | -2.11 | SCGB2A2 | 0.000388691 | -1.73 |
| KANK1   | 1.07E-90 | -2.07 | DIRAS3  | 4.32E-20    | -1.72 |
| EPHB6   | 4.48E-32 | -2.05 | HPGD    | 1.44E-13    | -1.72 |
| CDH4    | 4.70E-47 | -2.04 | FOXC1   | 3.12E-19    | -1.68 |
| NR4A3   | 2.79E-34 | -2.04 | THSD1   | 3.52E-77    | -1.68 |
| NDN     | 4.13E-66 | -2.03 | PPARA   | 2.72E-57    | -1.67 |
| SOX7    | 1.94E-73 | -2.03 | CDH5    | 3.31E-66    | -1.66 |
| ABCG2   | 1.85E-47 | -2.02 | CCDC136 | 4.53E-41    | -1.65 |
| ZNF366  | 3.68E-47 | -2.02 | SASH1   | 1.66E-47    | -1.64 |
| LHX6    | 9.35E-57 | -2    | AKR1B15 | 2.42E-12    | -1.63 |
| PTCH1   | 4.69E-51 | -2    | BHLHE41 | 8.56E-39    | -1.62 |
| RECK    | 1.56E-66 | -2    | CEBPA   | 1.30E-47    | -1.62 |
| CSMD1   | 1.54E-22 | -1.98 | ADAMTS9 | 3.45E-43    | -1.61 |
| FOXO1   | 4.58E-96 | -1.98 | CDH13   | 1.93E-65    | -1.61 |
| DCDC2   | 2.17E-14 | -1.97 | CFTR    | 1.48E-18    | -1.61 |
| DPP4    | 1.75E-35 | -1.97 | DNAJB4  | 1.21E-83    | -1.61 |
| DLEC1   | 3.95E-30 | -1.6  | KLF10   | 1.50E-60    | -1.24 |
| PLD1    | 5.73E-47 | -1.58 | THBD    | 8.21E-32    | -1.24 |
| TAGLN   | 2.84E-36 | -1.56 | DAB2IP  | 1.01E-60    | -1.23 |
| GPER1   | 5.21E-23 | -1.54 | LGALS7  | 4.7E-09     | -1.23 |
| STAT5A  | 1.22E-62 | -1.54 | PER2    | 4.96E-56    | -1.23 |
| DMBT1   | 1.02E-13 | -1.53 | PPM1L   | 8.98E-27    | -1.23 |
| FAT1    | 4.19E-28 | -1.52 | ASS1    | 1.75E-12    | -1.22 |
| ZDHHC2  | 5.00E-34 | -1.52 | GLI1    | 2.63E-15    | -1.22 |
| EFNA5   | 6.80E-17 | -1.49 | MIA2    | 3.31E-27    | -1.22 |
| BIN1    | 5.16E-36 | -1.48 | PPP2R1B | 2.07E-66    | -1.22 |
| CSN2    | 5.96E-23 | -1.47 | CLU     | 2.35E-16    | -1.21 |
| AIFM2   | 6.76E-60 | -1.45 | VWA5A   | 6.53E-26    | -1.2  |
| LRMP    | 8.74E-29 | -1.45 | TIMP3   | 3.56E-22    | -1.19 |
| DKK3    | 1.21E-34 | -1.44 | BMP4    | 2.47E-12    | -1.18 |

---

|          |           |       |          |             |       |
|----------|-----------|-------|----------|-------------|-------|
| EZH1     | 3.11E-101 | -1.43 | ERRFI1   | 1.74E-31    | -1.18 |
| KLF5     | 4.11E-17  | -1.43 | MXI1     | 2.89E-47    | -1.17 |
| EDA2R    | 1.56E-30  | -1.42 | RASL10B  | 1.48E-16    | -1.17 |
| ETS2     | 8.23E-60  | -1.42 | RPS6KA2  | 1.82E-40    | -1.16 |
| KLF6     | 4.47E-64  | -1.42 | IRF4     | 1.89E-09    | -1.15 |
| PDGFRL   | 6.13E-28  | -1.42 | MCC      | 4.96E-26    | -1.15 |
| RASL11A  | 2.28E-30  | -1.42 | SOX15    | 2.82E-12    | -1.14 |
| RARB     | 2.33E-32  | -1.41 | FOXO4    | 4.67E-57    | -1.13 |
| VIM      | 9.01E-49  | -1.4  | TFAP2B   | 0.003786231 | -1.13 |
| NFATC2   | 5.44E-17  | -1.39 | THRA     | 1.02E-38    | -1.12 |
| ZFP36L2  | 1.25E-48  | -1.39 | ALOX15B  | 0.0000605   | -1.11 |
| CYGB     | 1.33E-36  | -1.38 | CDKN2C   | 2.32E-32    | -1.11 |
| EPHA2    | 1.46E-44  | -1.38 | DAPK2    | 1.14E-30    | -1.11 |
| SOCS3    | 4.36E-29  | -1.38 | DCD      | 0.000375002 | -1.11 |
| MRVI1    | 3.75E-40  | -1.37 | FBLN1    | 5.00E-19    | -1.11 |
| PTGDR    | 1.55E-25  | -1.37 | SHPRH    | 1.16E-21    | -1.11 |
| GALR1    | 6.74E-78  | -1.36 | DAB2     | 1.48E-34    | -1.1  |
| MAP3K8   | 5.22E-35  | -1.36 | TDGF1    | 9.79E-21    | -1.1  |
| TCF7L2   | 8.96E-47  | -1.36 | CDK6     | 2.09E-15    | -1.09 |
| PGR      | 0.0000428 | -1.34 | FBXW7    | 1.88E-83    | -1.09 |
| VSNL1    | 1.14E-12  | -1.33 | TANK     | 1.67E-72    | -1.08 |
| PDLIM4   | 5.72E-21  | -1.32 | CTNNA3   | 3.29E-26    | -1.07 |
| UNC5C    | 8.01E-16  | -1.32 | LATS2    | 1.08E-41    | -1.07 |
| PLA2G16  | 1.01E-23  | -1.31 | TCF4     | 2.97E-27    | -1.07 |
| ITGB3    | 1.03E-22  | -1.3  | DCUN1D3  | 1.34E-74    | -1.06 |
| YAP1     | 1.85E-55  | -1.3  | DFNA5    | 7.93E-36    | -1.05 |
| EYA4     | 9.05E-12  | -1.27 | PRDM11   | 2.34E-33    | -1.05 |
| AFAP1L2  | 1.57E-26  | -1.26 | RASSF3   | 1.17E-18    | -1.04 |
| PLCE1    | 5.94E-16  | -1.26 | AJAP1    | 3.57E-14    | -1    |
| SFRP5    | 8.86E-17  | -1.25 | ANKRD30A | 0.011597573 | -1    |
| AXIN2    | 7.11E-19  | -1    | SFRP4    | 0.0000108   | -0.82 |
| NDRG4    | 1.81E-13  | -1    | SIK1     | 7.41E-12    | -0.82 |
| ARHGAP29 | 5.49E-21  | -0.99 | CCNDBP1  | 9.14E-40    | -0.81 |
| GSTP1    | 6.98E-11  | -0.98 | EPHA3    | 0.00000238  | -0.81 |
| ZBTB4    | 1.99E-60  | -0.98 | LATS1    | 9.68E-13    | -0.81 |

|         |             |       |         |             |       |
|---------|-------------|-------|---------|-------------|-------|
| SOD2    | 4.68E-24    | -0.97 | MAL     | 0.0000057   | -0.8  |
| AHR     | 1.69E-21    | -0.95 | PHLPP1  | 1.02E-22    | -0.8  |
| MTUS1   | 1.34E-23    | -0.94 | TBRG1   | 7.32E-56    | -0.8  |
| RASSF8  | 1.21E-15    | -0.94 | EPB41L3 | 5.35E-13    | -0.79 |
| TNFSF12 | 9.39E-37    | -0.94 | ING3    | 3.26E-42    | -0.79 |
| BTG2    | 9.67E-13    | -0.93 | EHF     | 0.000710106 | -0.78 |
| CDH17   | 3.80E-18    | -0.92 | RBL2    | 1.37E-29    | -0.77 |
| CITED2  | 2.34E-23    | -0.92 | SSBP2   | 6.61E-18    | -0.76 |
| STARD13 | 4.17E-25    | -0.92 | IFI16   | 8.45E-14    | -0.74 |
| ADPRH   | 9.09E-39    | -0.91 | PTEN    | 1.07E-28    | -0.74 |
| GPC5    | 3.67E-14    | -0.91 | PTENP1  | 3.91E-24    | -0.74 |
| HIPK2   | 8.90E-17    | -0.91 | USP12   | 7.02E-12    | -0.74 |
| NUAK1   | 1.28E-20    | -0.9  | ALOX15  | 0.001932497 | -0.73 |
| PRKAA1  | 1.39E-28    | -0.9  | KIF1B   | 7.29E-26    | -0.73 |
| TMEFF2  | 1.08E-42    | -0.9  | RASAL1  | 0.002957746 | -0.73 |
| HIC1    | 9.62E-16    | -0.89 | ATM     | 8.65E-21    | -0.72 |
| PTPRT   | 0.004588064 | -0.89 | EEF1A1  | 6.47E-36    | -0.72 |
| TSC22D1 | 9.85E-45    | -0.89 | ROBO1   | 1.16E-10    | -0.72 |
| FAM172A | 7.10E-44    | -0.88 | RPL5    | 8.00E-29    | -0.72 |
| IQGAP2  | 1.58E-09    | -0.88 | BLCAP   | 1.75E-41    | -0.71 |
| DUSP22  | 7.49E-51    | -0.87 | DUSP26  | 0.000000587 | -0.71 |
| FBXO31  | 1.45E-61    | -0.87 | FLNA    | 3.8E-14     | -0.71 |
| FBXO32  | 8.82E-14    | -0.87 | CTDSPL  | 4.12E-30    | -0.7  |
| LIMA1   | 6.09E-25    | -0.87 | LRIG1   | 2.16E-12    | -0.7  |
| OSGIN1  | 1.76E-11    | -0.87 | RASSF10 | 0.00208321  | -0.7  |
| CEBPD   | 1.8E-11     | -0.86 | BMPR1A  | 1.84E-24    | -0.69 |
| ESRRB   | 6.41E-11    | -0.86 | GLTSCR2 | 4.9E-14     | -0.69 |
| FAS     | 3.33E-17    | -0.86 | HACE1   | 2.23E-21    | -0.69 |
| LSAMP   | 0.000000586 | -0.86 | PLCD1   | 1.34E-18    | -0.69 |
| PCDHGC3 | 7.68E-26    | -0.86 | PRKCE   | 4.89E-14    | -0.69 |
| SMARCA2 | 1.11E-40    | -0.86 | ST5     | 1.53E-18    | -0.69 |
| ERBB4   | 0.002736371 | -0.84 | PHLDA3  | 4.09E-10    | -0.68 |
| SH3GLB1 | 9.92E-69    | -0.84 | S100A2  | 0.007300953 | -0.68 |
| SMYD4   | 8.09E-70    | -0.84 | SCUBE2  | 0.018003547 | -0.68 |
| TBX5    | 2.32E-10    | -0.84 | ACSM1   | 0.00169842  | -0.67 |

---

|         |             |       |          |             |       |
|---------|-------------|-------|----------|-------------|-------|
| BNIP3L  | 1.95E-32    | -0.83 | ADARB1   | 5.04E-25    | -0.67 |
| BCL6B   | 9.53E-22    | -0.82 | CTGF     | 0.000000396 | -0.67 |
| IGFBP3  | 2.09E-16    | -0.82 | ITGB1    | 9.73E-28    | -0.67 |
| PTPN13  | 8.49E-10    | -0.82 | PTPN11   | 2.09E-27    | -0.67 |
| UNC5D   | 0.000000046 | -0.67 | NR2C2    | 7.94E-15    | -0.63 |
| EXTL2   | 1.09E-27    | -0.66 | CACNA2D3 | 0.0000644   | -0.62 |
| FHIT    | 1.85E-08    | -0.66 | NEDD4    | 3.71E-13    | -0.62 |
| RNF144A | 5.79E-11    | -0.66 | RPL11    | 1.05E-20    | -0.62 |
| DCC     | 8.62E-13    | -0.65 | SDHD     | 2.41E-34    | -0.62 |
| NFATC1  | 2.66E-12    | -0.65 | DDX3X    | 9.60E-41    | -0.61 |
| AKR1B1  | 5.57E-13    | -0.64 | LZTS1    | 3.24E-10    | -0.61 |
| CBL     | 2.59E-21    | -0.64 | JDP2     | 3.06E-13    | -0.6  |
| GLIPR1  | 3.02E-12    | -0.64 | NEDD4L   | 2.12E-11    | -0.6  |
| HBP1    | 1.68E-42    | -0.64 | ZBTB7C   | 0.000340151 | -0.6  |
| NOTCH1  | 3.46E-14    | -0.64 | APC      | 4.40E-17    | -0.59 |
| PRKAA2  | 0.001869145 | -0.64 | EHD3     | 7.75E-13    | -0.59 |
| RTN4    | 1.67E-36    | -0.64 | HECA     | 4.20E-28    | -0.59 |
| SMAD4   | 7.65E-34    | -0.64 | NDRG1    | 0.00000295  | -0.59 |
| VTCN1   | 0.024513818 | -0.64 | PF4      | 4.91E-25    | -0.59 |
| KIF7    | 2.26E-08    | -0.63 | TOM1L2   | 1.65E-14    | -0.59 |

---



**Supplemental Table 3. 45 TSGs with a significant difference enrichment of H3K27ac marker between breast cancer and normal tissue.**

| <b>45 TSGs with a significant difference enrichment of H3K27ac marker</b> |         |         |        |
|---------------------------------------------------------------------------|---------|---------|--------|
| LTF                                                                       | SPRY2   | ZBTB16  | ERBB4  |
| FOXC1                                                                     | PGR     | SYNM    | NOTCH1 |
| ANKRD30A                                                                  | EFNA5   | NTRK3   | MTUS1  |
| RASSF3                                                                    | AIFM2   | PPP1R1B | PRKAA2 |
| CSRNP1                                                                    | KANK1   | AGTR1   | FAS    |
| TGFBR3                                                                    | AFAP1L2 | LRIG1   | GPBR1  |
| KLF5                                                                      | PLCE1   | NDRG1   | SOD2   |
| PLD1                                                                      | PTCH1   | IQGAP2  | ZBTB7C |
| PLA2G16                                                                   | ADAMTS8 | BNIP3L  | SCUBE2 |
| IL17RD                                                                    | CDK6    | BTG2    | PTPRT  |
| LRIG3                                                                     | ASS1    | HECA    | PHLDA3 |
| RASSF10                                                                   |         |         |        |

**Supplemental Table 4. A list of NamiRNA candidates in breast cancer based on text mining.**

| <b>NamiRNAs</b> | <b>Expression levels</b> | <b>NamiRNAs</b> | <b>Expression levels</b> |
|-----------------|--------------------------|-----------------|--------------------------|
| hsa-miR-107     | up                       | hsa-miR-762     | up                       |
| hsa-miR-1245a   | up                       | hsa-miR-765     | up                       |
| hsa-miR-1323    | up                       | hsa-miR-1246    | down                     |
| hsa-miR-137     | up                       | hsa-miR-1248    | down                     |
| hsa-miR-151b    | up                       | hsa-miR-362     | down                     |
| hsa-miR-184     | up                       | hsa-miR-1258    | down                     |
| hsa-miR-190b    | up                       | hsa-miR-1275    | down                     |
| hsa-miR-320b    | up                       | hsa-miR-1290    | down                     |
| hsa-miR-3646    | up                       | hsa-miR-1469    | down                     |
| hsa-miR-3648    | up                       | hsa-miR-1471    | down                     |
| hsa-miR-3687    | up                       | hsa-miR-18a     | down                     |
| hsa-miR-375     | up                       | hsa-miR-320d    | down                     |
| hsa-miR-421     | up                       | hsa-miR-326     | down                     |
| hsa-miR-4257    | up                       | hsa-miR-320e    | down                     |
| hsa-miR-429     | up                       | hsa-miR-339     | down                     |
| hsa-miR-4306    | up                       | hsa-miR-376     | down                     |
| hsa-miR-449a    | up                       | hsa-miR-3923    | down                     |
| hsa-miR-484     | up                       | hsa-miR-448     | down                     |
| hsa-miR-492     | up                       | hsa-miR-451a    | down                     |
| hsa-miR-562     | up                       | hsa-miR-4521    | down                     |
| hsa-miR-573     | up                       | hsa-miR-4634    | down                     |
| hsa-miR-575     | up                       | hsa-miR-496     | down                     |
| hsa-miR-578     | up                       | hsa-miR-520b    | down                     |
| hsa-miR-592     | up                       | hsa-miR-520h    | down                     |
| hsa-miR-603     | up                       | hsa-miR-564     | down                     |
| hsa-miR-608     | up                       | hsa-miR-567     | down                     |
| hsa-miR-618     | up                       | hsa-miR-568     | down                     |
| hsa-miR-630     | up                       | hsa-miR-613     | down                     |
| hsa-miR-632     | up                       | hsa-miR-621     | down                     |
| hsa-miR-638     | up                       | hsa-miR-676     | down                     |

---

|              |    |              |      |
|--------------|----|--------------|------|
| hsa-miR-661  | up | hsa-miR-718  | down |
| hsa-miR-663a | up | hsa-miR-802  | down |
| hsa-miR-760  | up | hsa-miR-892a | down |
| hsa-miR-762  | up | hsa-miR-892b | down |
| hsa-miR-765  | up | hsa-miR-95   | down |

---

**Supplemental Table 5. 332 potential targeted TSGs positively regulated by miR-339 in breast cancer.**

| <b>Potential targeted TSGs of miR-339</b> |         |          |         |
|-------------------------------------------|---------|----------|---------|
| ABCG2                                     | EI24    | MAP3K8   | RPL5    |
| ABI2                                      | EIF3F   | MARCKS   | RTN4    |
| ACHE                                      | EMP1    | MARVELD1 | RUNX3   |
| ADAMTS8                                   | EPAS1   | MCC      | S100A2  |
| ADARB1                                    | EPB41   | MIA      | SAA1    |
| ADIPOQ                                    | EPHA2   | MIA2     | SASH1   |
| AFAP1L2                                   | EPHB6   | MLH3     | SCUBE2  |
| AGTR1                                     | ESR2    | MRVI1    | SDHD    |
| AHCYL1                                    | ETS2    | MT1M     | SEMA3B  |
| AHNAK                                     | EXTL2   | MT2A     | SEMA3G  |
| AHR                                       | EZH1    | MTUS1    | SEPT4   |
| AIF1                                      | FABP3   | MXI1     | SHISA3  |
| AKAP12                                    | FAS     | NAPEPLD  | SIAH1   |
| AKR1B15                                   | FAT1    | NCOA4    | SIK1    |
| ALOX15                                    | FBLN1   | NDRG1    | SIRT1   |
| ALOX15B                                   | FBXO25  | NDRG2    | SIRT2   |
| ANAPC1                                    | FBXO31  | NDRG4    | SIRT3   |
| ANGPTL4                                   | FBXO32  | NEDD4    | SIRT4   |
| ANXA1                                     | FHL1    | NEDD4L   | SLIT2   |
| APAF1                                     | FLNA    | NF1      | SMAD2   |
| ARHGEF12                                  | FOXC1   | NF2      | SMARCA2 |
| ARNTL                                     | G0S2    | NFATC1   | SMCHD1  |
| ATF3                                      | GABARAP | NFATC2   | SOCS3   |
| ATMIN                                     | GADD45A | NGFR     | SOD2    |
| ATR                                       | GALR1   | NKX3-1   | SOX15   |
| AZGP1                                     | GKN1    | NNAT     | SOX7    |
| BCL10                                     | GLI1    | NOTCH2   | SPRY2   |
| BCL6B                                     | GLIPR1  | NPAS2    | SPRY4   |
| BCORL1                                    | GLTSCR2 | NR4A1    | SRPX    |
| BCR                                       | GNB2L1  | NR4A3    | SSBP2   |

---

|          |         |         |           |
|----------|---------|---------|-----------|
| BHLHE41  | GPC5    | NRF1    | ST5       |
| BIN1     | GPER1   | NUMB    | STAC2     |
| BLCAP    | GPIHBP1 | NUP98   | STARD13   |
| BMP4     | GSN     | OSGIN1  | STAT3     |
| BMPR1A   | GSTP1   | OXTR    | STAT5A    |
| BNIP3L   | HBP1    | PAIP2   | SUFU      |
| BTG2     | HEPACAM | PBRM1   | SYNM      |
| BTG3     | HIC1    | PCDHGC3 | SYNPO2    |
| CABLES1  | HIPK2   | PDCD4   | TAGLN     |
| CAMTA1   | HIRA    | PDLIM4  | TANK      |
| CAV1     | HIVEP1  | PF4     | TAT       |
| CBL      | HIVEP3  | PGRMC2  | TCEAL7    |
| CCDC136  | HSPB7   | PHLDA3  | TCEB3     |
| CCNDBP1  | ID4     | PHLPP2  | TCF7L2    |
| CD300LG  | IGFBP3  | PIWIL2  | TDGF1     |
| CD82     | IGFBP4  | PKD1    | TET2      |
| CDH17    | IKZF2   | PLA2G16 | TFPI2     |
| CDH5     | IL17RD  | PLCD1   | THBD      |
| CDKN1A   | ING3    | PLCE1   | THRA      |
| CDKN1C   | ING4    | PLD1    | THRB      |
| CDO1     | ING5    | PML     | THSD1     |
| CIDEC    | INPP4B  | PPARA   | TIMP3     |
| CITED2   | IQGAP2  | PPARG   | TMEFF2    |
| CIZ1     | IRF4    | PPP1R1B | TNFAIP3   |
| CLDN1    | ITGA7   | PPP2R1B | TNFRSF10A |
| CLDN23   | ITGB1   | PPP2R5C | TNFRSF10B |
| CLU      | ITGB3   | PRDM2   | TOM1L2    |
| CNN1     | KANK1   | PRKAA1  | TOPORS    |
| CTNNBIP1 | KAT5    | PRKAR1A | TRIM13    |
| CTNND1   | KCNRG   | PRODH   | TRIM35    |
| CUL1     | KDM3A   | PTCH1   | TSC22D1   |
| CYB5A    | KDM5A   | PTCH2   | TTF1      |
| CYGB     | KIF7    | PTEN    | TUSC5     |
| DAB2IP   | KLF10   | PTPN11  | TXNIP     |
| DDB2     | KLF5    | PTPRK   | UHRF2     |

---

---

|        |         |         |         |
|--------|---------|---------|---------|
| DDR2   | KLF6    | RAP1A   | USP12   |
| DDX3X  | KRIT1   | RASAL1  | UVRAG   |
| DFFA   | KRT17   | RASAL2  | VIM     |
| DFNA5  | LATS1   | RASL10A | VSNL1   |
| DKK3   | LATS2   | RASSF1  | WISP3   |
| DLC1   | LEFTY2  | RASSF4  | WNT11   |
| DLEC1  | LGALS7  | RB1CC1  | YAP1    |
| DLK1   | LHX6    | RBBP8   | YPEL3   |
| DMBT1  | LIFR    | RBM5    | ZBTB4   |
| DMTF1  | LIMA1   | RBM6    | ZBTB7C  |
| DNAJB4 | LITAF   | RBMS3   | ZFHX3   |
| DPH1   | LLGL1   | RBP7    | ZFP36   |
| DPP4   | LRRC4   | RCHY1   | ZFP36L2 |
| DUSP1  | LTF     | RHOB    | ZHX2    |
| DUSP6  | LXN     | RNASEL  | ZNF185  |
| EDNRB  | LZTS1   | RND3    | ZNF292  |
| EEF1A1 | MAB21L1 | RPA1    | ZNF366  |
| EGR1   | MAL     | RPL10   | ZYX     |

---

**Supplemental Table 6. 127 upregulated genes after transfecting miR-339 in breast cancer cells.**

| Gene         | Log2(Fold change) | P-value  | Gene    | Log2(Fold change) | P-value  |
|--------------|-------------------|----------|---------|-------------------|----------|
| CDIPT-AS1    | 4.16              | 4.36E-02 | KREMEN1 | 0.88              | 5.00E-02 |
| LOC101929140 | 4.07              | 1.22E-02 | PIK3IP1 | 0.88              | 2.90E-03 |
| MIR6732      | 3.71              | 1.05E-02 | POMZP3  | 0.87              | 1.53E-02 |
| FPR1         | 3.54              | 2.61E-02 | SMPD3   | 0.85              | 9.76E-03 |
| UPK3B        | 3.47              | 1.73E-02 | SAA2    | 0.85              | 5.06E-03 |
| SLC30A3      | 3.15              | 8.77E-03 | CA2     | 0.84              | 4.37E-02 |
| FBXO2        | 2.67              | 6.73E-03 | MDP1    | 0.82              | 4.81E-02 |
| SLC14A1      | 2.63              | 4.62E-02 | WFDC2   | 0.82              | 2.23E-02 |
| PRSS30P      | 2.43              | 2.60E-02 | IL32    | 0.82              | 7.58E-03 |
| MB           | 2.07              | 1.39E-03 | HLA-F   | 0.81              | 7.66E-03 |
| ATP6V1B1     | 1.89              | 1.84E-02 | HSH2D   | 0.79              | 4.65E-02 |
| SERPING1     | 1.68              | 1.68E-02 | PTPRH   | 0.78              | 7.35E-03 |
| GLI1         | 1.66              | 1.21E-02 | LLGL2   | 0.77              | 1.87E-02 |
| EAF2         | 1.63              | 6.73E-03 | PLXNB1  | 0.77              | 1.82E-02 |
| HLA-DQB1     | 1.57              | 4.60E-02 | DDIT4   | 0.77              | 2.32E-02 |
| CCL2         | 1.55              | 4.50E-02 | LYL1    | 0.76              | 4.54E-03 |
| ARL9         | 1.49              | 4.93E-02 | LRRC26  | 0.76              | 2.24E-02 |
| GPC2         | 1.43              | 3.33E-02 | MAP3K8  | 0.75              | 3.14E-03 |
| CSF2         | 1.43              | 5.52E-19 | CDKN2D  | 0.75              | 8.78E-04 |
| GP6          | 1.43              | 4.56E-02 | TRAF1   | 0.75              | 1.90E-07 |
| GHRL         | 1.42              | 3.39E-02 | CORO1A  | 0.74              | 1.09E-02 |
| IL6          | 1.39              | 2.61E-10 | ASNS    | 0.73              | 1.10E-06 |
| DMBT1        | 1.34              | 1.14E-02 | TNK1    | 0.73              | 1.76E-02 |
| CCL20        | 1.32              | 2.80E-06 | HSD17B8 | 0.72              | 1.06E-02 |
| CXCL3        | 1.31              | 8.43E-15 | VWA1    | 0.72              | 1.68E-04 |
| F13A1        | 1.27              | 1.12E-02 | SLC6A9  | 0.72              | 1.24E-02 |
| MUC6         | 1.23              | 1.73E-04 | BOLA1   | 0.72              | 3.32E-02 |
| SLPI         | 1.23              | 1.32E-03 | VIPR1   | 0.72              | 3.23E-02 |
| SPINT1       | 1.18              | 1.53E-03 | RAB3D   | 0.71              | 2.42E-02 |
| TMPRSS2      | 1.18              | 2.87E-02 | GALNT2  | 0.71              | 6.94E-04 |

---

|                  |      |          |           |      |          |
|------------------|------|----------|-----------|------|----------|
| ERBB3            | 1.15 | 1.31E-02 | CPE       | 0.71 | 2.06E-02 |
| TCF4             | 1.14 | 4.39E-02 | LPAR2     | 0.70 | 1.23E-02 |
| ICOSLG           | 1.13 | 1.26E-02 | LINC00116 | 0.70 | 1.38E-03 |
| LCN2             | 1.12 | 4.37E-09 | AKR1B1    | 0.69 | 4.13E-03 |
| PARTICL          | 1.12 | 2.06E-02 | SLC43A2   | 0.68 | 4.50E-02 |
| SUSD2            | 1.10 | 1.68E-02 | PTGFRN    | 0.68 | 1.44E-02 |
| LOC1019297<br>05 | 1.09 | 2.78E-02 | MYO1D     | 0.67 | 4.65E-02 |
| IL20RB           | 1.06 | 4.17E-02 | WNK4      | 0.67 | 3.53E-02 |
| LOC113230        | 1.05 | 2.59E-02 | PTPN6     | 0.67 | 4.02E-02 |
| GPER1            | 1.05 | 1.39E-02 | JUNB      | 0.67 | 7.53E-07 |
| ADAP2            | 1.04 | 4.28E-02 | SH3BP1    | 0.65 | 1.41E-02 |
| GIPR             | 1.04 | 3.96E-02 | ZG16B     | 0.65 | 2.39E-03 |
| HIST2H2BE        | 1.03 | 1.61E-02 | LSR       | 0.65 | 2.79E-02 |
| PI3              | 1.03 | 4.31E-03 | HLA-DPA1  | 0.65 | 7.45E-03 |
| SPNS3            | 1.02 | 2.95E-02 | C9orf16   | 0.64 | 5.65E-04 |
| TAF12            | 1.00 | 1.43E-03 | TRIB3     | 0.64 | 2.20E-02 |
| MALAT1           | 1.00 | 7.56E-03 | ZNF385A   | 0.63 | 3.03E-03 |
| CXCL2            | 1.00 | 9.59E-09 | TMEM53    | 0.63 | 3.75E-02 |
| ODF3B            | 0.99 | 9.09E-03 | MMP15     | 0.63 | 3.86E-02 |
| LYPD3            | 0.99 | 7.96E-03 | ST14      | 0.62 | 4.27E-02 |
| LIN7B            | 0.99 | 1.85E-03 | MEF2BNB   | 0.62 | 4.20E-02 |
| VEGFA            | 0.99 | 1.54E-05 | DHRS7     | 0.62 | 6.47E-03 |
| IL411            | 0.97 | 2.10E-02 | G0S2      | 0.61 | 4.33E-06 |
| CXCL8            | 0.97 | 1.12E-04 | PCK2      | 0.61 | 1.05E-03 |
| PDZK1IP1         | 0.95 | 5.48E-03 | HID1      | 0.61 | 4.82E-02 |
| MXD3             | 0.94 | 6.92E-04 | UNC119    | 0.61 | 2.07E-03 |
| CXCL1            | 0.94 | 1.27E-03 | S100A3    | 0.60 | 2.72E-02 |
| PTGS2            | 0.93 | 1.10E-02 | DHRS4L2   | 0.60 | 4.98E-02 |
| SAA1             | 0.93 | 1.67E-05 | TTC9      | 0.60 | 2.60E-02 |
| TFEB             | 0.91 | 3.31E-03 | ARHGAP33  | 0.60 | 3.01E-02 |
| TAGLN            | 0.89 | 4.31E-04 | RRAD      | 0.59 | 6.88E-04 |
| MIR1914          | 0.89 | 4.18E-02 | WIBG      | 0.59 | 5.08E-03 |
| CX3CL1           | 0.89 | 4.58E-03 | SOD2      | 0.59 | 2.91E-02 |
| GRB7             | 0.89 | 1.07E-04 |           |      |          |

---



**Supplemental Table 7. 91 upregulated genes modulated by miR-339 through targeting enhancer and their targeting sites on enhancer in breast cancer cells.**

| Upregulated target_gene | miR339 _target _num | enhancer_ chr | enhancer_start | enhancer_end | log2Fold Change |
|-------------------------|---------------------|---------------|----------------|--------------|-----------------|
| GPER1                   | 4                   | chr7          | 1066826        | 1085232      | 1.05            |
| IL32                    | 4                   | chr16         | 3069540        | 3074918      | 0.82            |
| IL32                    | 4                   | chr16         | 3108653        | 3110211      | 0.82            |
| MUC6                    | 4                   | chr11         | 1059960        | 1074107      | 1.23            |
| PRSS30P                 | 4                   | chr16         | 2917269        | 2919101      | 2.43            |
| PTPN6                   | 4                   | chr12         | 7026068        | 7054839      | 0.67            |
| SLC43A2                 | 4                   | chr17         | 1546736        | 1552353      | 0.68            |
| TNK1                    | 4                   | chr17         | 7253008        | 7267590      | 0.73            |
| TNK1                    | 4                   | chr17         | 7303186        | 7309418      | 0.73            |
| TRIB3                   | 4                   | chr20         | 326469         | 330075       | 0.64            |
| ZG16B                   | 4                   | chr16         | 2917269        | 2919101      | 0.65            |
| ZG16B                   | 4                   | chr16         | 2885027        | 2897659      | 0.65            |
| IL32                    | 3                   | chr16         | 3155959        | 3156760      | 0.82            |
| PTPN6                   | 3                   | chr12         | 7097504        | 7105013      | 0.67            |
| TRIB3                   | 3                   | chr20         | 396023         | 396829       | 0.64            |
| VWA1                    | 3                   | chr1          | 1409842        | 1410778      | 0.72            |
| ADAP2                   | 2                   | chr17         | 29232358       | 29234947     | 1.04            |
| ARHGAP33                | 2                   | chr19         | 36247415       | 36250236     | 0.60            |
| ARL9                    | 2                   | chr4          | 57331303       | 57335414     | 1.49            |
| ARL9                    | 2                   | chr4          | 57410849       | 57411618     | 1.49            |
| ARL9                    | 2                   | chr4          | 57396642       | 57397388     | 1.49            |
| ATP6V1B1                | 2                   | chr2          | 71203490       | 71206278     | 1.89            |
| BOLA1                   | 2                   | chr1          | 149902917      | 149912765    | 0.72            |
| BOLA1                   | 2                   | chr1          | 149855373      | 149861669    | 0.72            |
| BOLA1                   | 2                   | chr1          | 149819694      | 149827045    | 0.72            |
| BOLA1                   | 2                   | chr1          | 149830185      | 149835266    | 0.72            |
| CCL20                   | 2                   | chr2          | 228681910      | 228684969    | 1.32            |
| CCL20                   | 2                   | chr2          | 228726924      | 228747807    | 1.32            |
| CDKN2D                  | 2                   | chr19         | 10725994       | 10730369     | 0.75            |
| CORO1A                  | 2                   | chr16         | 30203328       | 30221731     | 0.74            |
| CX3CL1                  | 2                   | chr16         | 57450592       | 57452140     | 0.89            |
| CXCL2                   | 2                   | chr4          | 74969030       | 74984221     | 1.00            |
| DHRS4L2                 | 2                   | chr14         | 24475454       | 24476783     | 0.60            |
| DMBT1                   | 2                   | chr10         | 124325098      | 124359538    | 1.34            |
| ERBB3                   | 2                   | chr12         | 56513325       | 56524007     | 1.15            |
| ERBB3                   | 2                   | chr12         | 56497061       | 56500541     | 1.15            |
| FPR1                    | 2                   | chr19         | 52206587       | 52208952     | 3.54            |
| FPR1                    | 2                   | chr19         | 52210488       | 52212474     | 3.54            |

---

|           |   |       |           |           |      |
|-----------|---|-------|-----------|-----------|------|
| FPR1      | 2 | chr19 | 52280380  | 52312573  | 3.54 |
| G0S2      | 2 | chr1  | 209817889 | 209841963 | 0.61 |
| G0S2      | 2 | chr1  | 209861563 | 209866588 | 0.61 |
| GIPR      | 2 | chr19 | 46132731  | 46146784  | 1.42 |
| GIPR      | 2 | chr19 | 46219311  | 46228601  | 1.42 |
| GLI1      | 2 | chr12 | 57822952  | 57825827  | 1.66 |
| GP6       | 2 | chr19 | 55517018  | 55518162  | 1.43 |
| GP6       | 2 | chr19 | 55582631  | 55583499  | 1.43 |
| GPC2      | 2 | chr7  | 99745527  | 99757386  | 1.43 |
| HIST2H2BE | 2 | chr1  | 149809900 | 149816844 | 1.03 |
| HIST2H2BE | 2 | chr1  | 149902917 | 149912765 | 1.03 |
| HIST2H2BE | 2 | chr1  | 149819694 | 149827045 | 1.03 |
| HIST2H2BE | 2 | chr1  | 149830185 | 149835266 | 1.03 |
| HLA-F     | 2 | chr6  | 29719383  | 29721364  | 0.81 |
| HSD17B8   | 2 | chr6  | 33215501  | 33218839  | 0.72 |
| HSD17B8   | 2 | chr6  | 33180621  | 33181862  | 0.72 |
| HSD17B8   | 2 | chr6  | 33122993  | 33130716  | 0.72 |
| HSH2D     | 2 | chr19 | 16270619  | 16274747  | 0.79 |
| HSH2D     | 2 | chr19 | 16291600  | 16310179  | 0.79 |
| ICOSLG    | 2 | chr21 | 45668432  | 45672520  | 1.13 |
| IL20RB    | 2 | chr3  | 136673199 | 136675755 | 1.06 |
| IL4I1     | 2 | chr19 | 50378341  | 50382384  | 0.97 |
| IL4I1     | 2 | chr19 | 50368679  | 50374249  | 0.97 |
| IL4I1     | 2 | chr19 | 50361288  | 50363758  | 0.97 |
| IL4I1     | 2 | chr19 | 50350985  | 50352724  | 0.97 |
| JUNB      | 2 | chr19 | 12868006  | 12868581  | 0.67 |
| KREMEN1   | 2 | chr22 | 29424561  | 29441935  | 0.88 |
| LCN2      | 2 | chr9  | 130952452 | 130956555 | 1.12 |
| LCN2      | 2 | chr9  | 130921129 | 130923361 | 1.12 |
| LCN2      | 2 | chr9  | 130898931 | 130900234 | 1.12 |
| LIN7B     | 2 | chr19 | 49587561  | 49590545  | 0.99 |
| LIN7B     | 2 | chr19 | 49630779  | 49631400  | 0.99 |
| LIN7B     | 2 | chr19 | 49645833  | 49654301  | 0.99 |
| LLGL2     | 2 | chr17 | 73510522  | 73513638  | 0.77 |
| LOC113230 | 2 | chr19 | 14128606  | 14135128  | 1.05 |
| LOC113230 | 2 | chr19 | 14228812  | 14231094  | 1.05 |
| LPAR2     | 2 | chr19 | 19783111  | 19784401  | 0.70 |
| LPAR2     | 2 | chr19 | 19701046  | 19729785  | 0.70 |
| LRRC26    | 2 | chr9  | 140072174 | 140085208 | 0.76 |
| LRRC26    | 2 | chr9  | 140043962 | 140057894 | 0.76 |
| LRRC26    | 2 | chr9  | 140015944 | 140025575 | 0.76 |
| LRRC26    | 2 | chr9  | 140111364 | 140114037 | 0.76 |
| LYL1      | 2 | chr19 | 13259332  | 13267351  | 0.76 |
| LYL1      | 2 | chr19 | 13226311  | 13230407  | 0.76 |

---

---

|          |   |       |           |           |      |
|----------|---|-------|-----------|-----------|------|
| LYL1     | 2 | chr19 | 13123166  | 13172894  | 0.76 |
| LYL1     | 2 | chr19 | 13253134  | 13255766  | 0.76 |
| LYL1     | 2 | chr19 | 13250950  | 13252287  | 0.76 |
| LYL1     | 2 | chr19 | 13241928  | 13244475  | 0.76 |
| MALAT1   | 2 | chr11 | 65237796  | 65242559  | 1.00 |
| MALAT1   | 2 | chr11 | 65211761  | 65216222  | 1.00 |
| MALAT1   | 2 | chr11 | 65220022  | 65225691  | 1.00 |
| MALAT1   | 2 | chr11 | 65313477  | 65314300  | 1.00 |
| MALAT1   | 2 | chr11 | 65307402  | 65309453  | 1.00 |
| MAP3K8   | 2 | chr10 | 30675338  | 30677851  | 0.75 |
| MB       | 2 | chr22 | 35957489  | 35966634  | 2.07 |
| MB       | 2 | chr22 | 36042195  | 36046587  | 2.07 |
| MB       | 2 | chr22 | 36017332  | 36026276  | 2.07 |
| MDP1     | 2 | chr14 | 24715766  | 24722016  | 0.82 |
| MIR1914  | 2 | chr20 | 62525175  | 62543306  | 0.89 |
| MIR1914  | 2 | chr20 | 62579989  | 62589817  | 0.89 |
| MIR1914  | 2 | chr20 | 62608147  | 62613767  | 0.89 |
| MMP15    | 2 | chr16 | 58018096  | 58039372  | 0.63 |
| ODF3B    | 2 | chr22 | 51001385  | 51002198  | 0.99 |
| PDZK1IP1 | 2 | chr1  | 47644518  | 47645909  | 0.95 |
| PIK3IP1  | 2 | chr22 | 31636597  | 31641041  | 0.88 |
| PLXNB1   | 2 | chr3  | 48511509  | 48515640  | 0.77 |
| PLXNB1   | 2 | chr3  | 48442865  | 48444331  | 0.77 |
| POMZP3   | 2 | chr7  | 76196940  | 76249732  | 0.87 |
| PTPRH    | 2 | chr19 | 55762160  | 55772120  | 0.78 |
| PTPRH    | 2 | chr19 | 55657110  | 55679136  | 0.78 |
| RAB3D    | 2 | chr19 | 11454003  | 11455400  | 0.71 |
| RAB3D    | 2 | chr19 | 11484671  | 11492129  | 0.71 |
| RRAD     | 2 | chr16 | 66981474  | 66982354  | 0.59 |
| RRAD     | 2 | chr16 | 66906398  | 66934725  | 0.59 |
| RRAD     | 2 | chr16 | 66958607  | 66962881  | 0.59 |
| S100A3   | 2 | chr1  | 153535651 | 153541942 | 0.60 |
| S100A3   | 2 | chr1  | 153504085 | 153510374 | 0.60 |
| S100A3   | 2 | chr1  | 153478833 | 153480236 | 0.60 |
| S100A3   | 2 | chr1  | 153526320 | 153527273 | 0.60 |
| S100A3   | 2 | chr1  | 153510764 | 153511912 | 0.60 |
| S100A3   | 2 | chr1  | 153569190 | 153586597 | 0.60 |
| SAA1     | 2 | chr11 | 18266626  | 18270419  | 0.93 |
| SAA1     | 2 | chr11 | 18333666  | 18351686  | 0.93 |
| SAA1     | 2 | chr11 | 18287572  | 18291258  | 0.93 |
| SAA2     | 2 | chr11 | 18287572  | 18291258  | 0.85 |
| SERPING1 | 2 | chr11 | 57404767  | 57407522  | 1.68 |
| SERPING1 | 2 | chr11 | 57332904  | 57336286  | 1.68 |
| SH3BP1   | 2 | chr22 | 38069631  | 38074959  | 0.65 |

---

---

|           |   |       |           |           |      |
|-----------|---|-------|-----------|-----------|------|
| SH3BP1    | 2 | chr22 | 38028705  | 38032705  | 0.65 |
| SLC14A1   | 2 | chr18 | 43354594  | 43356226  | 2.63 |
| SLC30A3   | 2 | chr2  | 27515916  | 27526602  | 3.15 |
| SLC6A9    | 2 | chr1  | 44489784  | 44517654  | 0.72 |
| SLC6A9    | 2 | chr1  | 44443904  | 44446943  | 0.72 |
| SLC6A9    | 2 | chr1  | 44537407  | 44551791  | 0.72 |
| SLPI      | 2 | chr20 | 43921672  | 43922746  | 1.23 |
| SOD2      | 2 | chr6  | 160136690 | 160150793 | 0.59 |
| SPINT1    | 2 | chr15 | 41117482  | 41119073  | 1.18 |
| SPINT1    | 2 | chr15 | 41060748  | 41086722  | 1.18 |
| SPINT1    | 2 | chr15 | 41158131  | 41158861  | 1.18 |
| ST14      | 2 | chr11 | 129990092 | 129995471 | 0.62 |
| SUSD2     | 2 | chr22 | 24541384  | 24553819  | 1.10 |
| TAF12     | 2 | chr1  | 28927488  | 28929607  | 1.00 |
| TAGLN     | 2 | chr11 | 117092034 | 117093057 | 0.89 |
| TAGLN     | 2 | chr11 | 117076481 | 117078695 | 0.89 |
| TFEB      | 2 | chr6  | 41753318  | 41757437  | 0.91 |
| TMEM53    | 2 | chr1  | 45172065  | 45209732  | 0.63 |
| TMEM53    | 2 | chr1  | 45094043  | 45098973  | 0.63 |
| TRAF1     | 2 | chr9  | 123686026 | 123708942 | 0.75 |
| TRAF1     | 2 | chr9  | 123654168 | 123655985 | 0.75 |
| TRAF1     | 2 | chr9  | 123630057 | 123640849 | 0.75 |
| UPK3B     | 2 | chr7  | 76049723  | 76100123  | 3.47 |
| VEGFA     | 2 | chr6  | 43692239  | 43693775  | 0.99 |
| VEGFA     | 2 | chr6  | 43737116  | 43743665  | 0.99 |
| VEGFA     | 2 | chr6  | 43765787  | 43767267  | 0.99 |
| VIPR1     | 2 | chr3  | 42512852  | 42539768  | 0.72 |
| WFDC2     | 2 | chr20 | 44064964  | 44065911  | 0.82 |
| WFDC2     | 2 | chr20 | 44046755  | 44049142  | 0.82 |
| WIBG      | 2 | chr12 | 56364208  | 56375128  | 0.59 |
| WNK4      | 2 | chr17 | 40965765  | 40971520  | 0.67 |
| ZNF385A   | 2 | chr12 | 54772517  | 54773742  | 0.63 |
| ZNF385A   | 2 | chr12 | 54751489  | 54755011  | 0.63 |
| ZNF385A   | 2 | chr12 | 54804644  | 54826328  | 0.63 |
| CX3CL1    | 1 | chr16 | 57374914  | 57375690  | 0.89 |
| CXCL2     | 1 | chr4  | 74999482  | 75000209  | 1.00 |
| FPR1      | 1 | chr19 | 52209063  | 52210053  | 3.54 |
| GHRL      | 1 | chr3  | 10283668  | 10284208  | 1.42 |
| GPC2      | 1 | chr7  | 99814403  | 99815923  | 1.43 |
| HIST2H2BE | 1 | chr1  | 149818748 | 149819685 | 1.03 |
| IL6       | 1 | chr7  | 22735332  | 22736848  | 1.39 |
| MALAT1    | 1 | chr11 | 65277556  | 65278370  | 1.00 |
| MXD3      | 1 | chr5  | 176726433 | 176728810 | 0.94 |
| MXD3      | 1 | chr5  | 176752513 | 176753833 | 0.94 |

---

---

|         |   |       |           |           |      |
|---------|---|-------|-----------|-----------|------|
| PLXNB1  | 1 | chr3  | 48475430  | 48476007  | 0.77 |
| POMZP3  | 1 | chr7  | 76262477  | 76263352  | 0.87 |
| RAB3D   | 1 | chr19 | 11403833  | 11404646  | 0.71 |
| S100A3  | 1 | chr1  | 153544391 | 153546358 | 0.60 |
| S100A3  | 1 | chr1  | 153524728 | 153525485 | 0.60 |
| SH3BP1  | 1 | chr22 | 37985671  | 37987628  | 0.65 |
| SMPD3   | 1 | chr16 | 68485709  | 68486751  | 0.85 |
| TMPRSS2 | 1 | chr21 | 42926255  | 42927180  | 1.18 |
| UNC119  | 1 | chr17 | 26889970  | 26891339  | 0.61 |
| VIPR1   | 1 | chr3  | 42492444  | 42494105  | 0.72 |

---
